# Supplementary material
Source: PubMed Central journal article supplement (PMC2914209)
Supplement: NIHMS210333-supplement-01.pdf [file NIHMS210333-supplement-01.pdf]

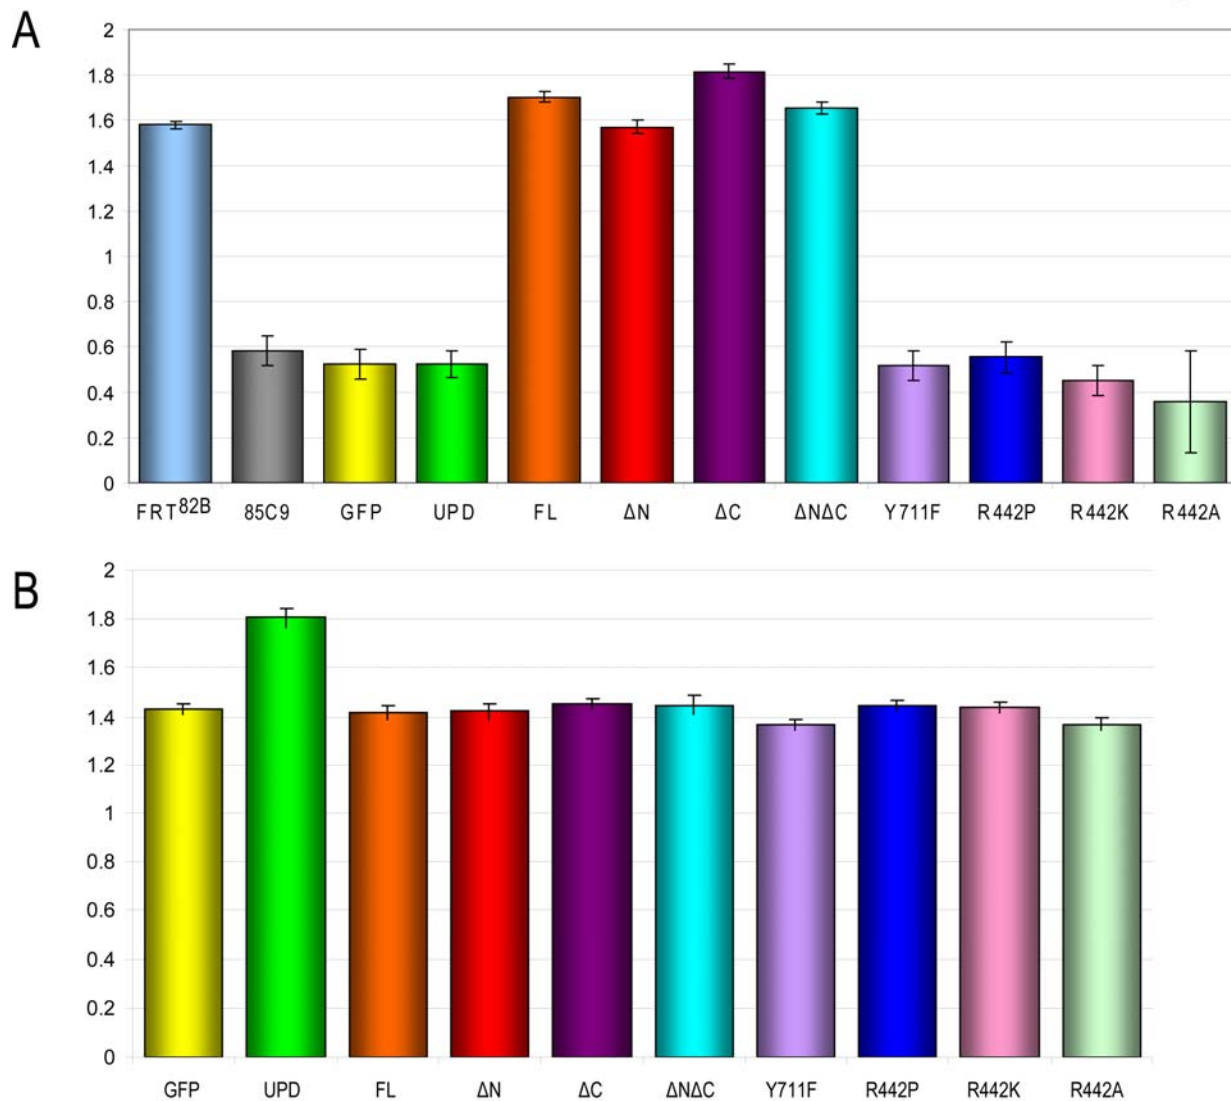

**Figure S1. Quantification of *Stat92E* eye rescue assay and overexpression of *Stat92E* transgenes in a wild type eye.** (A) Quantification of *Stat92E* variants in the *Stat92E*<sup>85C9</sup> rescue assay. Area of adult eyes in arbitrary units as measured by Image J. N=20, females only. (B) Overexpression of *Stat92E* transgenes in a wild type background using *ey-Gal4* has no effect on the size of the adult eye. Conversely, overexpression of *upd* using *ey-Gal4* results in a significant increase in the size of the adult eye (green bar). N=20, females only.

Ekas et al., Fig S2

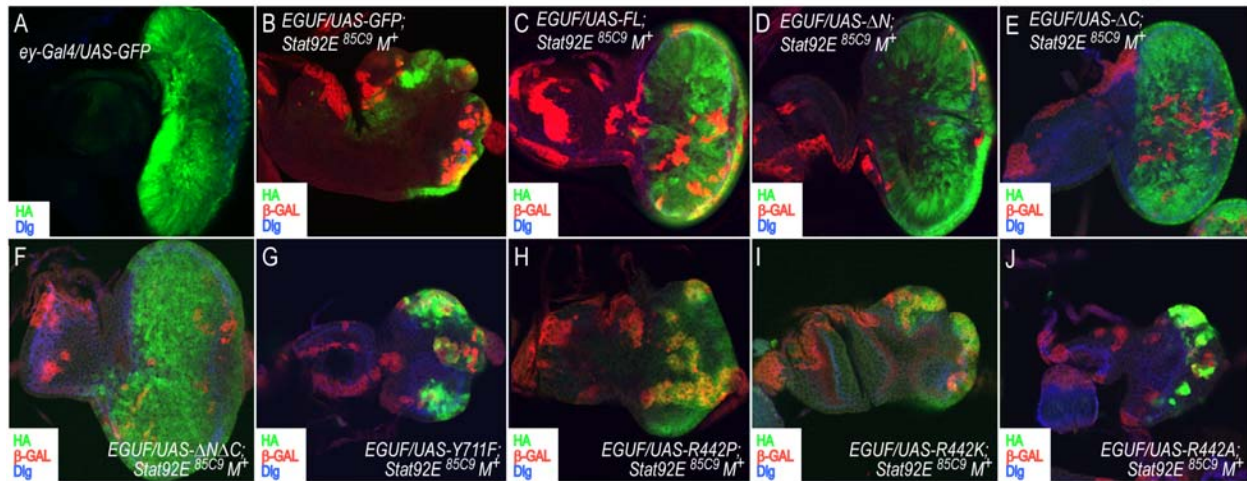

**Figure S2. *Stat92E* transgene expression *in vivo*.** (A-J) HA staining of *Stat92E* transgenes. (A) A third instar eye disc in which *ey-GAL4* drives expression of *UAS-GFP* in a wild type background. (B-J) Third instar eye discs in which *Stat92E*<sup>85C9</sup> M<sup>+</sup> tissue was induced by *EGUF* and in which *UAS-3HA-Stat92E* transgenes were mis-expressed throughout the eye disc by the *ey-Gal4* insertion on the *EGUF* chromosome: *UAS-GFP* (B), *Stat92E*<sup>FL</sup> (C), *Stat92E*<sup>ΔN</sup> (D), *Stat92E*<sup>ΔC</sup> (E), *Stat92E*<sup>ΔNΔC</sup> (F), *Stat92E*<sup>Y711F</sup> (G), *Stat92E*<sup>R442P</sup> (H), *Stat92E*<sup>R442K</sup> (I), and *Stat92E*<sup>R442A</sup> (J) in a *Stat92E*<sup>85C9</sup> M<sup>+</sup> background. *Stat92E*<sup>85C9</sup> M<sup>+</sup> tissue is marked by the absence of β-GAL (anti-β-GAL (red)), anti-HA (green), Dlg (blue). HA is expressed ubiquitously when transgenes that rescue the *Stat92E* mutant phenotype are expressed in the eye disc (C-F). Transgenes that do not rescue are not expressed ubiquitously (B,G-J).
